# Supplementary material for: Genomic regression analysis of coordinated expression
Source: PubMed Central journal article supplement (PMC5736603; doi:10.1038/s41467-017-02181-0), 2017-12-19
Supplement: 41467_2017_2181_MOESM3_ESM.pdf [file 41467_2017_2181_MOESM3_ESM.pdf]

## **Description of Additional Supplementary Files**

File Name: Supplementary Data 1

Description: Genes with different co-expressing genes in tumor vs normal tissue.

File Name: Supplementary Data 2

Description: Number of genes whose transcription levels are significantly correlated with orthogonal molecular features by RNA or residuals.
